# Supplementary material for: The Differential Metabolic Signature of Breast Cancer Cellular Response to Olaparib Treatment
Source: MDPI journal article supplement (doi:10.3390/cancers14153661), 2022-07-27
Supplement: s1 [file s1]

## Supplementary materials

**Table S1.** Cell lines used in this study and their corresponding clinicopathologic profiles

| Cell Line         | Histology                 | Subtype    | Immunoprofile   | Genetic alterations                 |
|-------------------|---------------------------|------------|-----------------|-------------------------------------|
| <b>MCF-7</b>      | Metastatic Adenocarcinoma | Luminal A  | ER+, PR+, HER2- | PIK3CA, CDKN2A, GATA3, PIK3CA, TP53 |
| <b>MDA-MB-231</b> | Metastatic Adenocarcinoma | Basal      | ER-, PR-, HER2- | BRAF, CDKN2A, KRAS, NF2, TP53       |
| <b>HCC1937</b>    | Primary Ductalcarcinoma   | Basal-like | ER-, PR-, HER2- | BRCA1, TP53                         |

ER: estrogen receptor, PR: progesterone receptor, and HER2: Human epidermal growth factor 2 receptor).

### Elution Gradient used for LC-MS

**Buffer A composition:** 10 mM ammonium acetate in 95% acetonitrile, 5% water with 0.1% acetic acid

**Buffer B composition:** 10 mM ammonium acetate in 50% acetonitrile, 50% water with 0.1% acetic acid

**Table S1.** Corresponding elution gradient used for the chromatographic separation of metabolite extracts

| Retention (min) | Flow (mL/min) | %A   | %B   | Curve |
|-----------------|---------------|------|------|-------|
| 0.000           | 0.500         | 99.0 | 1.0  | 5     |
| 1.000           | 0.500         | 99.0 | 1.0  | 5     |
| 3.000           | 0.500         | 85.0 | 15.0 | 5     |
| 6.000           | 0.500         | 50.0 | 50.0 | 5     |
| 9.000           | 0.500         | 5.0  | 95.0 | 5     |
| 10.000          | 0.500         | 5.0  | 95.0 | 5     |
| 10.500          | 0.500         | 99.0 | 1.0  | 5     |
| 14.000          | 0.500         | 99.0 | 1.0  | 5     |

**Table S3.** Normality test for cell viability and immunofluorescence quantification data.

| <i>Cell viability</i> |         | <i>Immunofluorescence</i> |             |               |
|-----------------------|---------|---------------------------|-------------|---------------|
|                       |         |                           |             |               |
| Cell line             | p-value | Cell line                 | p-value_p53 | p-value_γH2AX |
| MCF7                  | 0.5     | MCF7                      | 0.7         | 0.1           |
| MDA-MB-231            | 0.3     | MDA-MB-231                | 0.3         | 0.9           |
| HCC1937               | 0.3     | HCC1937                   | 0.7         | 0.1           |

The Shapiro-Wilk test has been performed with R software. p-values of >0.05 were considered as normally distributed.

### LC-MS/MS method summary

- **Method Settings**

Application Mode: Small Molecule

Method duration (min): 14

- **Global Parameters**

Ion Source

Ion Source type: H-ESI

Spray Voltage: Static

Positive Ion (V): 3900

Negative Ion (V): 2700

Gas Mode: Static

Sheath Gas (Arb): 40

Aux Gas (Arb): 10

Sweep Gas (Arb): 1

Ion Transfer Tube Temp (°C): 320

Vaporizer Temp (°C): 300

APPI Lamp: Not in use

Use Ion Source settings from Tune: False

FAIMS Mode: Not Installed

MS Global Settings

Infusion Mode: Liquid Chromatography

Expected LC Peak Width (s): 6

Advanced Peak Determination: False

Mild Trapping: True

Default Charge State: 1

Enable Xcalibur AcquireX method modifications: False

Internal Mass Calibration: EASY-IC™

Mode: Run Start

- **Experiment**

Start Time (min): 0

End Time (min): 14

Full Scan

Orbitrap Resolution: 60,000

Scan Range (m/z): 70-1050

RF Lens (%): 50  
AGC Target: Standard  
Maximum Injection Time Mode: Custom  
Maximum Injection Time (ms): 100  
Microscans: 1  
Data Type: Profile  
Polarity: Positive/Negative  
Source Fragmentation: Disabled  
Use EASY-C™: On

- Filters

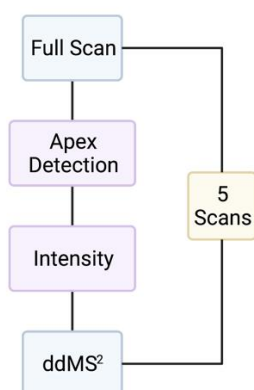

#### Apex Detection

Desired Apex Window (%): 50

#### Intensity

Intensity Threshold: 5.0e4

Data Dependent Mode: Number of Scans

Number of Dependent Scans: 5

#### ddMS² Scan

Multiplex Ions: False

Isolation Window (m/z): 2

Isolation Offset: Off

Collision Energy Type: Normalised

HCD Collision Energies (%): 15,30,45

Orbitrap Resolution: 15,000

Scan Range Mode: Auto

AGC Target: Standard

Maximum Injection Time Mode: Auto

Microscans: 1

Data Type: Profile

Use EASY-IC™: On

## Mass Spectrometry Data Processing

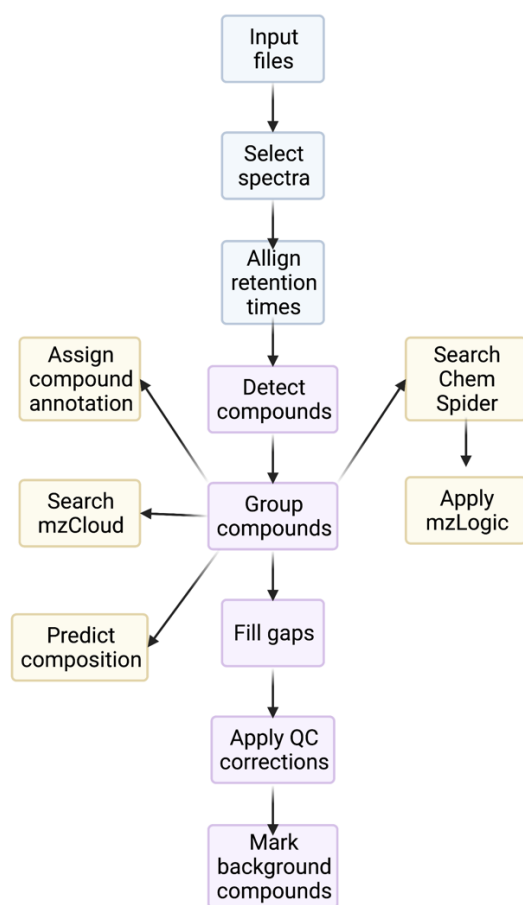

- **Input Files**

.raw data

- **Select Spectra**

Spectrum Properties Filter:

Lower RT Limit: 0

Upper RT Limit: 0

First Scan: 0

Last Scan: 0

Ignore Specified Scans: (not specified)

Lowest Charge State: 0

Highest Charge State: 0

Min. Precursor Mass: 0 Da

Max. Precursor Mass: 5000 Da

Total Intensity Threshold: 0

Minimum Peak Count: 1

Scan Event Filters:

Mass Analyzer: (not specified)

MS Order: Any

Activation Type: (not specified)

Min. Collision Energy: 0

Max. Collision Energy: 1000

Scan Type: Any  
Polarity Mode: Is -

Peak Filters:

S/N Threshold (FT-only): 1.5

Replacements for Unrecognized Properties:

Unrecognized Charge Replacements: 1  
Unrecognized Mass Analyzer Replacements: ITMS  
Unrecognized MS Order Replacements: MS2  
Unrecognized Activation Type Replacements: CID  
Unrecognized Polarity Replacements: +  
Unrecognized MS Resolution@200 Replacements: 60000  
Unrecognized MSn Resolution@200 Replacements: 30000

General Settings:

Precursor Selection: Use MS(n - 1) Precursor  
Use Isotope Pattern in Precursor Reevaluation: True  
Provide Profile Spectra: Automatic  
Store Chromatograms: False

- Align Retention Times

General Settings:

Alignment Model: Adaptive curve  
Alignment Fallback: None  
Maximum Shift [min]: 0.3  
Shift Reference File: True  
Mass Tolerance: 3 ppm  
Remove Outlier: True

- Detect Compounds

General Settings:

Mass Tolerance [ppm]: 3 ppm  
Intensity Tolerance [%]: 30  
S/N Threshold: 3  
Min. Peak Intensity: 500000  
Base Ions: [M+H]<sup>+</sup>+1; [M-H]<sup>-</sup>-1  
Min. Element Counts: C H  
Max. Element Counts: C90 H190 Br3 Cl4 K2 N10 Na2 O15 P6 S5

Peak Detection:

Filter Peaks: True  
Max. Peak Width [min]: 0.5  
Remove Singlets: True  
Min. # Scans per Peak: 5  
Min. # Isotopes: 1

Isotope Grouping:

Min. Spectral Distance Score: 0  
Remove Potentially False Positive Isotopes: True

- Group Compounds

Compound Consolidation:

Mass Tolerance: 5 ppm

RT Tolerance [min]: 0.2

Fragment Data Selection:

Preferred Ions: [M+H]<sup>+</sup>+1; [M-H]<sup>-</sup>-1

- Fill Gaps

General Settings:

Mass Tolerance: 5 ppm

S/N Threshold: 1.5

Use Real Peak Detection: True

- Apply QC Correction

General Settings:

Regression Model: Linear

Min. QC Coverage [%]: 30

Max. QC Area RSD [%]: 30

Max. Corrected QC Area RSD [%]: 25

Max. # Files Between QC Files: 15

- Mark Background Compounds

General Settings:

Max. Sample/Blank: 5

Max. Blank/Sample: 0

Hide Background: True

- Search ChemSpider

Search Settings:

Database(s): ChEBI; Human Metabolome Database

Search Mode: By Formula or Mass

Mass Tolerance: 5 ppm

Max. # of results per compound: 100

Max. # of Predicted Compositions to be searched per Compound: 3

Result Order (for Max. # of results per compound): Order By Reference Count (DESC)

Predicted Composition Annotation:

Check All Predicted Compositions: False

- Apply mzLogic

Search Settings:

FT Fragment Mass Tolerance: 10 ppm

IT Fragment Mass Tolerance: 0.4 Da

Max. # Compounds: 0

Max. # mzCloud Similarity Results to consider per Compound: 10

Match Factor Threshold: 30

- Predict Compositions

Prediction Settings:

Mass Tolerance: 5 ppm  
 Min. Element Counts: C H  
 Max. Element Counts: C90 H190 Br3 Cl4 N10 O18 P3 S5  
 Min. RDBE: 0  
 Max. RDBE: 40  
 Min. H/C: 0.1  
 Max. H/C: 4  
 Max. # Candidates: 10  
 Max. # Internal Candidates: 200

Pattern Matching:

Intensity Tolerance [%]: 30  
 Intensity Threshold [%]: 0.1  
 S/N Threshold: 3  
 Min. Spectral Fit [%]: 30  
 Min. Pattern Cov. [%]: 90  
 Use Dynamic Recalibration: True

Fragments Matching:

Use Fragments Matching: True  
 Mass Tolerance: 5 ppm  
 S/N Threshold: 3

- Assign Compound Annotations

General Settings:

Mass Tolerance: 5 ppm  
 Data Sources:  
 Data Source #1: mzCloud Search  
 Data Source #2: Predicted Compositions  
 Data Source #3: MassList Search  
 Data Source #4: ChemSpider Search  
 Data Source #5: Metabolika Search  
 Data Source #6: (not specified)  
 Data Source #7: (not specified)

Scoring Rules:

Use mzLogic: True  
 Use Spectral Distance: True  
 SFit Threshold: 20  
 SFit Range: 20

- Search mzCloud

General Settings:

Compound Classes: All  
 Precursor Mass Tolerance: 10 ppm  
 FT Fragment Mass Tolerance: 10 ppm  
 IT Fragment Mass Tolerance: 0.4 Da  
 Library: Autoprocessed; Reference

Post Processing: Recalibrated  
 Max. # Results: 10  
 Annotate Matching Fragments: True

#### DDA Search:

Identity Search: Cosine  
 Match Activation Type: True  
 Match Activation Energy: Match with Tolerance  
 Activation Energy Tolerance: 20  
 Apply Intensity Threshold: True  
 Similarity Search: None  
 Match Factor Threshold: 60

#### DIA Search:

Use DIA Scans for Search: False  
 Max. Isolation Width [Da]: 500  
 Match Activation Type: False  
 Match Activation Energy: Any  
 Activation Energy Tolerance: 100  
 Apply Intensity Threshold: False  
 Match Factor Threshold: 20

- Differential Analysis

#### General Settings:

Log10 Transform Values: True

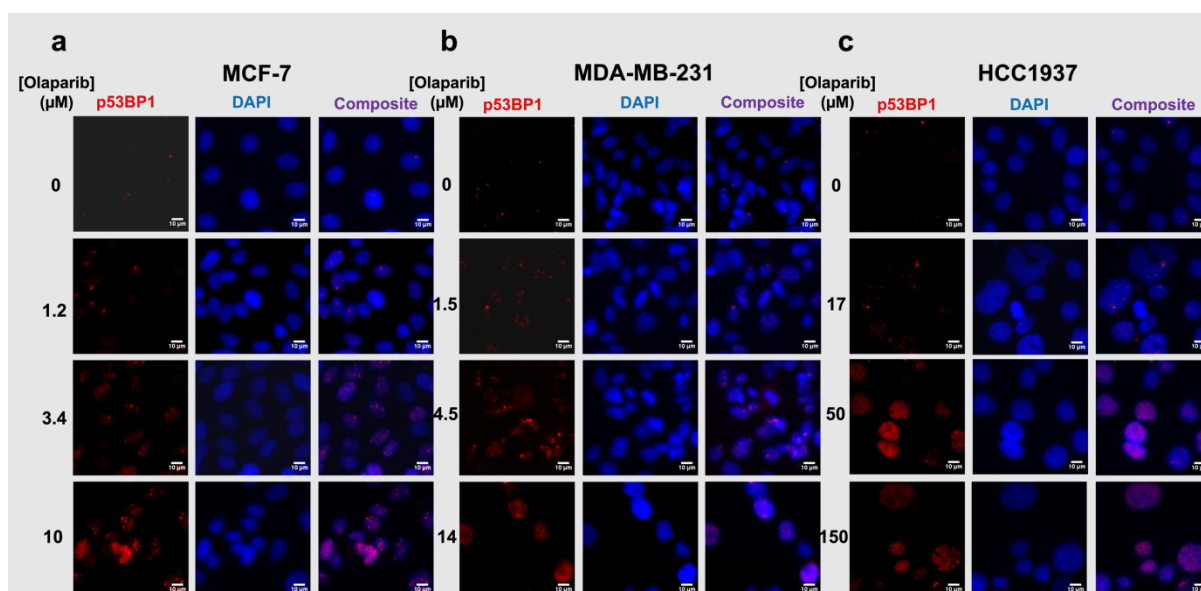

**Figure S1.** The formation of p53BP1 foci in response to treatment with either growth medium or medium containing olaparib at various doses. Representative images of immunolabelled P53BP1 foci (red), DAPI (blue) nuclear counterstain and composite (p53BP1 (red) and DAPI (blue)) in MCF-7, MDA-MB-231, and HCC1937 cells treated with olaparib for seven days (a-c).



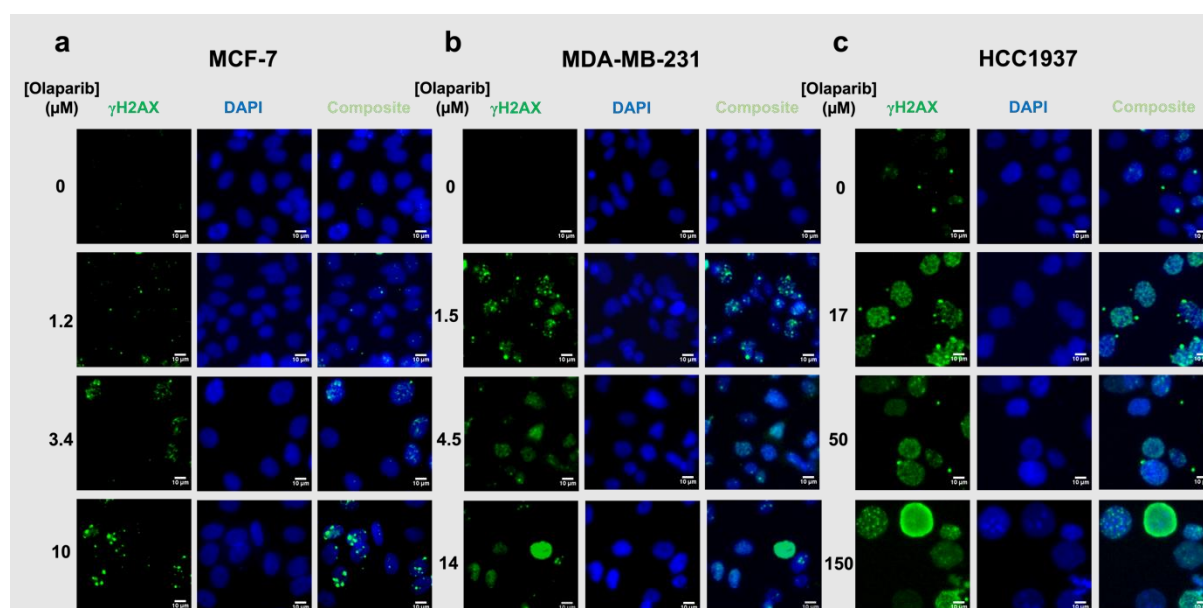

**Figure S2.** The formation of  $\gamma$ H2AX foci formation in response to treatment with either growth medium or medium containing olaparib at various doses. Representative images of immunolabelled  $\gamma$ H2AX foci (green), DAPI (blue) nuclear counterstain and composite ( $\gamma$ H2AX and DAPI) in MCF-7, MDA-MB-231, and HCC1937 cells treated with for seven days (a-c).

**Table S4.** ANOVA analysis of olaparib dose-dependent DNA DSB immunofoci formation

| Cell line  | Foci          | p-value                 |
|------------|---------------|-------------------------|
| MCF-7      | <i>53BP1</i>  | 0.011                   |
|            | $\gamma$ H2AX | $4.876 \times 10^{-10}$ |
| MDA-MB-231 | <i>53BP1</i>  | 0.0009                  |
|            | $\gamma$ H2AX | $4.096 \times 10^{-10}$ |
| HCC1937    | <i>53BP1</i>  | $1.204 \times 10^{-6}$  |
|            | $\gamma$ H2AX | $1.441 \times 10^{-5}$  |

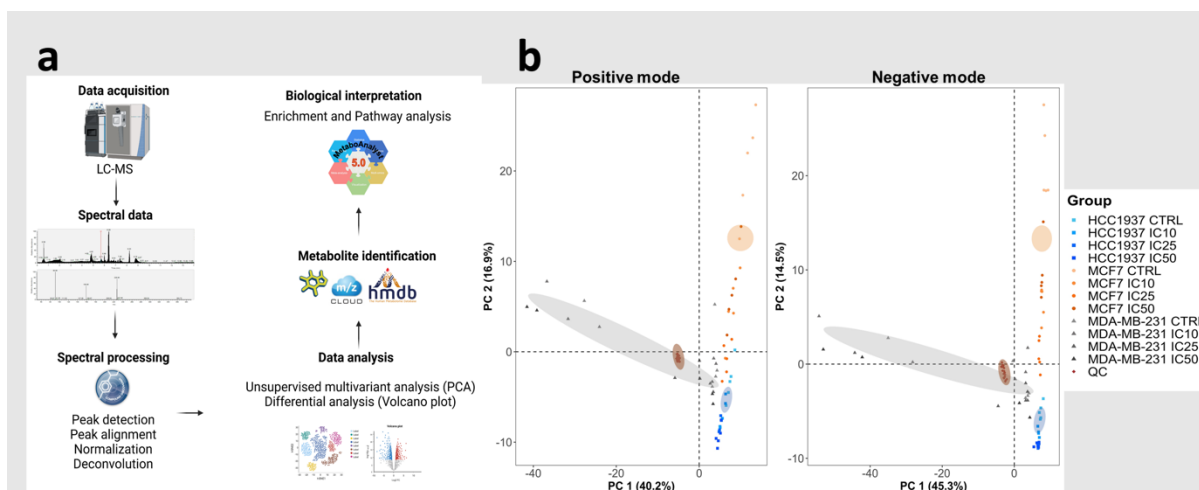

**Figure S3.** Untargeted mass spectrometry-based metabolomics and data analysis pipeline (a-created in Biorender.com). Global metabolic features identified in MCF7, MDA-MB-231 and HCC1937 upon exposure to IC<sub>10</sub>, IC<sub>25</sub> and IC<sub>50</sub> olaparib doses for seven days acquired in positive and negative ionization modes (b). For each treatment group, five replicates were used. Data points in the two-dimensional PCA score plot were central scaled (right).

Panel of individual PCA pairwise analysis of MCF7, MDA-MB-231 and HCC1937 at their relative IC<sub>10</sub>, IC<sub>25</sub> and IC<sub>50</sub> doses of Olaparib

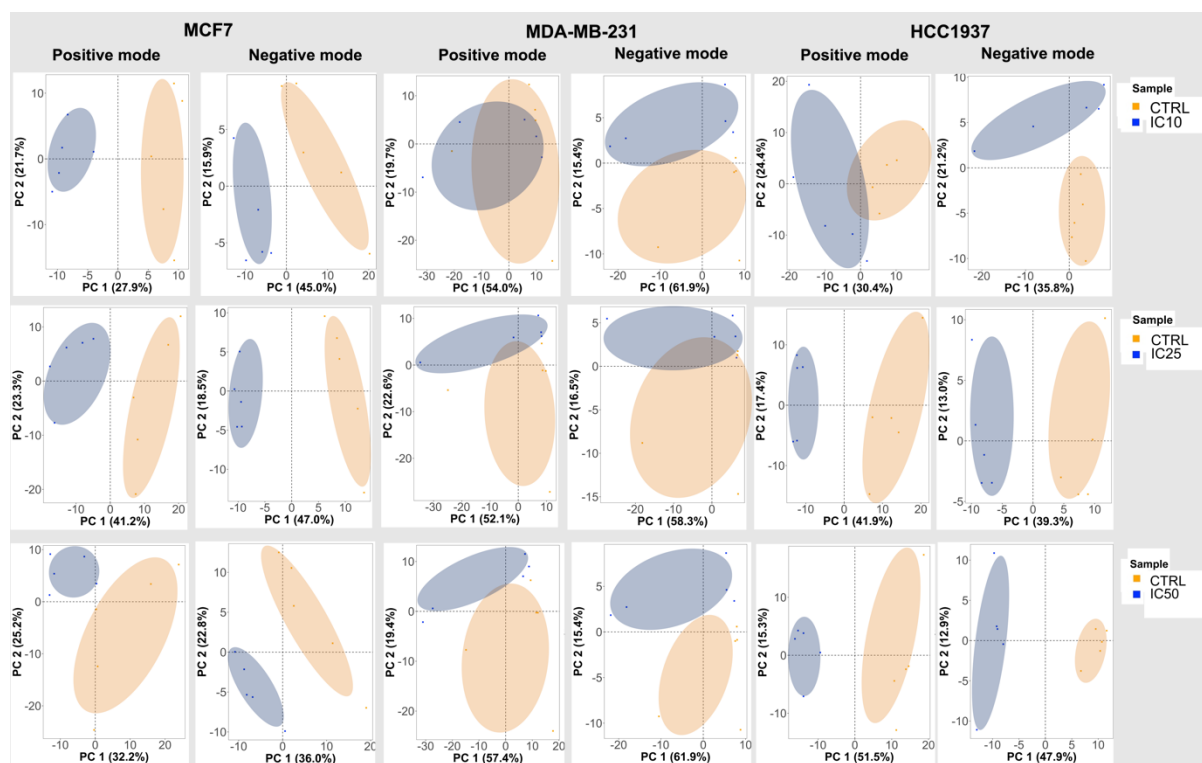

**Figure S4.** PCA pairwise analysis of untargeted metabolomics data collected, in both positive and negative mode, from MCF7, MDA-MB-231, and HCC1937 cells treated with IC<sub>10</sub>, IC<sub>25</sub> and IC<sub>50</sub> olaparib treatment doses. Data points in the two-dimensional PCA score plot were central scaled. The plot was designed on R through the ggplot2 graphical package (n = 5). Pairwise differential analysis of metabolites identified in MCF7, MDA-MB-231 and HCC1937 cells in positive and negative mode

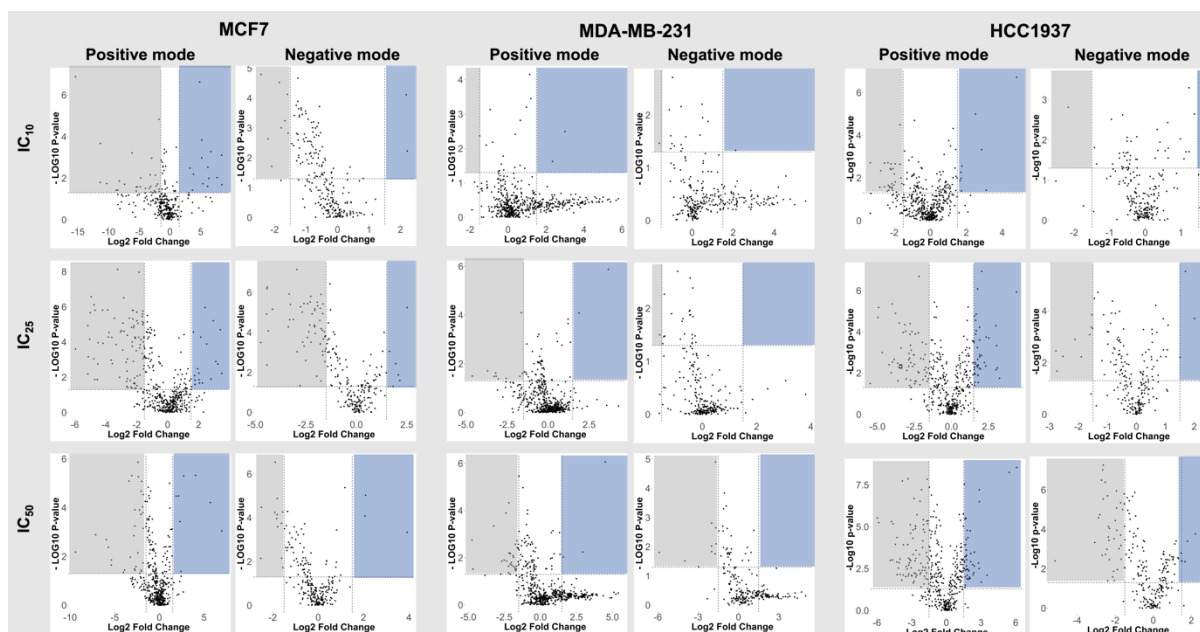

**Figure S5.** Volcano plots showing the log<sub>2</sub> fold change and the -log<sub>10</sub> adjusted p-values in metabolite levels induced by treatment with different doses of Olaparib (IC<sub>10</sub>, IC<sub>25</sub>, and IC<sub>50</sub>) in MCF7, MDA-MB-231 and HCC1937 cells. Data were selected at the cut off values adjusted  $p < 0.05$  and fold change  $> 1.5$ . Blue and grey boxes indicate metabolites significantly enriched and depleted in the different samples, respectively.

**Table S5.** Global differential number of altered metabolites for samples treated with IC<sub>10</sub>, IC<sub>25</sub> and IC<sub>50</sub> of Olaparib and their relative control (non-treated) samples.

| Sample            | HESI + | HESI - |
|-------------------|--------|--------|
| MCF7 IC10/Ctrl    | 41     | 10     |
| MCF7 IC25/Ctrl    | 111    | 62     |
| MCF7 IC50/Ctrl    | 41     | 15     |
| MDA231 IC10/Ctrl  | 2      | 1      |
| MDA231 IC25/Ctrl  | 12     | 1      |
| MDA231 IC50/Ctrl  | 34     | 9      |
| HCC1937 IC10/Ctrl | 36     | 2      |
| HCC1937 IC25/Ctrl | 107    | 13     |
| HCC1937 IC50/Ctrl | 134    | 43     |

Metabolites identified in both positive and negative mode with  $p\text{-value} = < 0.05$  and Log<sub>2</sub> Fold Change  $\geq 1.5$ .

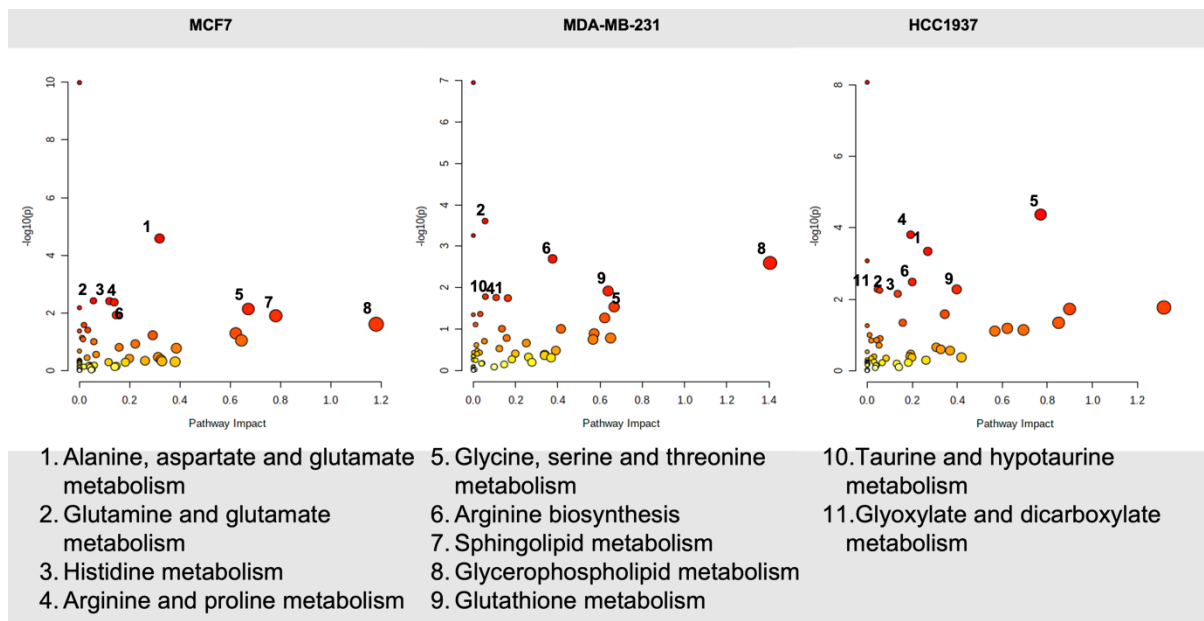

**Figure S6.** Enrichment analysis of non-treated MCF7, MDA-MB-231 and HCC1937 cells.

**Table S6.** Metabolic pathways in different breast cancer cells (MCF7, MDA-MB-231, and HCC1937) before and after treatment with IC<sub>50</sub> dose of Olaparib.

|            | - Olaparib                                  |          |          |          | + Olaparib                                  |          |          |          |
|------------|---------------------------------------------|----------|----------|----------|---------------------------------------------|----------|----------|----------|
|            | Pathways                                    | P-value  | FDR      | Impact   | Pathways                                    | P-value  | FDR      | Impact   |
| MCF7       | Aminoacyl-tRNA biosynthesis                 | 1.02E-10 | 8.57E-09 | 0        | Aminoacyl-tRNA biosynthesis                 | 8.19E-10 | 6.88E-08 | 0        |
|            | Alanine, aspartate and glutamate metabolism | 2.63E-05 | 0.001104 | 0.31879  | Arginine biosynthesis                       | 4.37E-06 | 0.000184 | 0.54769  |
|            | Glutamine and glutamate metabolism          | 3.83E-03 | 0.072247 | 0.055556 | Alanine, aspartate and glutamate metabolism | 1.31E-05 | 0.000366 | 0.25749  |
|            | Histidine metabolism                        | 3.94E-03 | 0.072247 | 0.11935  | Arginine and proline metabolism             | 0.000141 | 0.002965 | 0.20848  |
|            | Arginine and proline metabolism             | 4.30E-03 | 0.072247 | 0.13859  | Glutamine and glutamate metabolism          | 0.000363 | 0.006102 | 0.055556 |
|            | Valine, leucine and isoleucine biosynthesis | 0.006688 | 0.088594 | 0        | Valine, leucine and isoleucine biosynthesis | 0.000807 | 0.011293 | 0        |
|            | Glycine, serine and threonine metabolism    | 0.007382 | 0.088594 | 0.67221  | Taurine and hypotaurine metabolism          | 0.002633 | 0.0316   | 0.085714 |
|            | Arginine biosynthesis                       | 0.012025 | 0.11847  | 0.14615  | Glycine, serine and threonine metabolism    | 0.003952 | 0.040556 | 0.67221  |
|            | Sphingolipid metabolism                     | 0.012694 | 0.11847  | 0.78164  | Butanoate metabolism                        | 0.004345 | 0.040556 | 0.12169  |
|            | Glycerophospholipid metabolism              | 0.025021 | 0.20274  | 1.1815   | Vitamin B6 metabolism                       | 0.00747  | 0.062741 | 0.96579  |
| MDA-MB-231 | Pathways                                    | P-value  | FDR      | Impact   | Pathways                                    | P-value  | FDR      | Impact   |
|            | Aminoacyl-tRNA biosynthesis                 | 1.11E-07 | 9.31E-06 | 0        | Aminoacyl-tRNA biosynthesis                 | 4.87E-08 | 4.09E-06 | 0        |
|            | Glutamine and glutamate metabolism          | 0.000246 | 0.010315 | 0.055556 | Arginine biosynthesis                       | 4.44E-05 | 0.001297 | 0.54769  |
|            | Valine, leucine and isoleucine biosynthesis | 0.000549 | 0.015362 | 0        | Valine, leucine and isoleucine biosynthesis | 4.63E-05 | 0.001297 | 0        |
|            | Arginine biosynthesis                       | 0.00201  | 0.042201 | 0.37538  | Glutamine and glutamate metabolism          | 0.000348 | 0.007318 | 0.055556 |
|            | Glycerophospholipid metabolism              | 0.002519 | 0.042319 | 1.4051   | Arginine and proline metabolism             | 0.002382 | 0.040027 | 0.19139  |
|            | Glutathione metabolism                      | 0.012023 | 0.16708  | 0.63816  | Glycine, serine and threonine metabolism    | 0.003697 | 0.05176  | 0.35674  |
|            | Taurine and hypotaurine metabolism          | 0.016455 | 0.16708  | 0.057143 | Alanine, aspartate and glutamate metabolism | 0.007553 | 0.087816 | 0.25155  |
|            | Arginine and proline metabolism             | 0.017286 | 0.16708  | 0.10783  | Pantothenate and CoA biosynthesis           | 0.008364 | 0.087816 | 0.025568 |
|            | Alanine, aspartate and glutamate metabolism | 0.017902 | 0.16708  | 0.16342  | Cysteine and methionine metabolism          | 0.016897 | 0.1577   | 0.74161  |
| HCC1937    | Glycine, serine and threonine metabolism    | 0.029087 | 0.24434  | 0.66667  | Taurine and hypotaurine metabolism          | 0.020936 | 0.17277  | 0.057143 |
|            | Pathways                                    | P-value  | FDR      | Impact   | Pathways                                    | P-value  | FDR      | Impact   |
|            | Aminoacyl-tRNA biosynthesis                 | 8.36E-09 | 7.03E-07 | 0        | Aminoacyl-tRNA biosynthesis                 | 6.05E-09 | 5.08E-07 | 0        |
|            | Glycine, serine and threonine metabolism    | 4.24E-05 | 0.001781 | 0.77013  | Arginine biosynthesis                       | 4.03E-06 | 0.000169 | 0.54769  |
|            | Arginine and proline metabolism             | 0.000156 | 0.004357 | 0.19275  | Alanine, aspartate and glutamate metabolism | 7.18E-05 | 0.002011 | 0.25692  |
|            | Alanine, aspartate and glutamate metabolism | 0.000455 | 0.009555 | 0.26907  | Glutamine and glutamate metabolism          | 0.000348 | 0.007318 | 0.055556 |
|            | Valine, leucine and isoleucine biosynthesis | 0.00084  | 0.014109 | 0        | Arginine and proline metabolism             | 0.000585 | 0.009829 | 0.19275  |
|            | Arginine biosynthesis                       | 0.003289 | 0.046045 | 0.2      | Valine, leucine and isoleucine biosynthesis | 0.000774 | 0.010591 | 0        |
|            | Glyoxylate and dicarboxylate metabolism     | 0.005277 | 0.052485 | 0.043771 | Glycine, serine and threonine metabolism    | 0.000883 | 0.010591 | 0.37754  |
|            | Glutathione metabolism                      | 0.005277 | 0.052485 | 0.39739  | Taurine and hypotaurine metabolism          | 0.002532 | 0.02658  | 0.085714 |
|            | Glutamine and glutamate metabolism          | 0.005623 | 0.052485 | 0.055556 | Cysteine and methionine metabolism          | 0.004844 | 0.045211 | 0.67619  |
|            | Histidine metabolism                        | 0.007034 | 0.05908  | 0.13548  | Butanoate metabolism                        | 0.022626 | 0.19004  | 0.12169  |

FDR = False Discovery Rate.

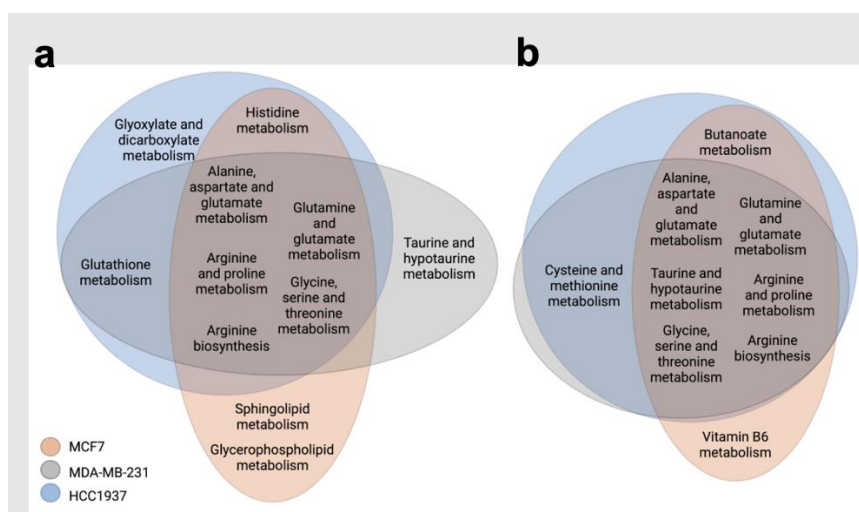

**Figure S7.** Venn diagram representing the metabolic pathways in MCF7, MDA-MB-231 and HCC1937 cells .a) Baseline metabolic pathways and b) following a seven day treatment with olaparib at IC<sub>50</sub> doses.

**Table S7.** Classification of the metabolites identified in MCF7, MDA-MB-231 and HCC1937 at all Olaparib doses (IC<sub>10</sub>, IC<sub>25</sub> and IC<sub>50</sub>) after seven days treatment.

| Class      | Name                     | MCF7                                          |          |                                               |          |                                               |          | MDA-MB-231                                    |          |                                               |          |                                               |          | HCC1937                                       |          |                                               |          |                                               |          |
|------------|--------------------------|-----------------------------------------------|----------|-----------------------------------------------|----------|-----------------------------------------------|----------|-----------------------------------------------|----------|-----------------------------------------------|----------|-----------------------------------------------|----------|-----------------------------------------------|----------|-----------------------------------------------|----------|-----------------------------------------------|----------|
|            |                          | Log <sub>2</sub> fold change IC <sub>10</sub> | <i>p</i> | Log <sub>2</sub> fold change IC <sub>25</sub> | <i>p</i> | Log <sub>2</sub> fold change IC <sub>50</sub> | <i>p</i> | Log <sub>2</sub> fold change IC <sub>10</sub> | <i>p</i> | Log <sub>2</sub> fold change IC <sub>25</sub> | <i>p</i> | Log <sub>2</sub> fold change IC <sub>50</sub> | <i>p</i> | Log <sub>2</sub> fold change IC <sub>10</sub> | <i>p</i> | Log <sub>2</sub> fold change IC <sub>25</sub> | <i>p</i> | Log <sub>2</sub> fold change IC <sub>50</sub> | <i>p</i> |
| Amide      | Nicotinamide             | -0.54                                         | 0.08     | -0.54                                         | 0.26     | -0.14                                         | 0.29     | -0.07                                         | 0.50     | -0.16                                         | 0.05     | -0.45                                         | 0.03     | 0.35                                          | 0.07     | 0.33                                          | 0.01     | -0.1                                          | 0.28     |
| Amine      | N-Oleoyl ethanolamine    | -1.48                                         | 0.13     | -0.81                                         | 0.63     | -0.08                                         | 0.61     | -0.46                                         | 0.29     | -3.19                                         | 0.02     | -0.61                                         | 0.26     | -1.64                                         | 0.17     | -2.48                                         | 0.03     | -1.16                                         | 0.02     |
| Amine      | Triethanolamine          | 1.03                                          | 0.56     | -0.6                                          | 0.03     | 0.05                                          | 0.15     | 2.87                                          | 0.43     | 0.57                                          | 0.76     | 3.05                                          | 0.41     | -0.46                                         | 0.47     | 0.42                                          | 0.13     | 0.39                                          | 0.50     |
| Amino acid | 3-Sulfinioalanine        | -1.05                                         | 0.45     | -1.75                                         | 0.03     | -1.07                                         | 0.15     | -                                             | -        | -0.65                                         | 0.33     | -                                             | -        | 0.32                                          | 0.71     | -0.41                                         | 0.64     | -0.67                                         | 0.02     |
| Amino acid | 4-Guanidinobutanoic acid | -1.26                                         | 0.01     | -2.03                                         | 0.00     | -1.13                                         | 0.00     | -0.22                                         | 0.49     | -0.28                                         | 0.57     | -0.46                                         | 0.16     | -1.03                                         | 0.08     | -1.82                                         | 0.01     | -1.81                                         | 0.00     |
| Amino acid | 4-Hydroxyproline         | -1.01                                         | 0.00     | -2.1                                          | 0.00     | -1.08                                         | 0.01     | -0.37                                         | 0.16     | -                                             | -        | -0.39                                         | 0.14     | -0.33                                         | 0.44     | -0.3                                          | 0.33     | -0.87                                         | 0.02     |
| Amino acid | 4-Oxoproline             | -0.7                                          | 0.34     | 0.88                                          | 0.03     | 0.16                                          | 0.24     | 0.36                                          | 0.55     | -0.27                                         | 0.03     | 0.81                                          | 0.06     | 0.64                                          | 0.03     | 1.03                                          | 0.01     | 1.47                                          | 0.00     |
| Amino acid | Betaine                  | -                                             | -        | -0.84                                         | 0.00     | -0.04                                         | 0.72     | -0.02                                         | 0.26     | -0.17                                         | 0.11     | -0.44                                         | 0.02     | -0.05                                         | 0.72     | -0.03                                         | 0.49     | -0.39                                         | 0.00     |
| Amino acid | Choline                  | -3.71                                         | 0.11     | -2.14                                         | 0.02     | -2.11                                         | 0.07     | 0.06                                          | 0.46     | -1.3                                          | 0.03     | -1.53                                         | 0.00     | -2.08                                         | 0.00     | -2.87                                         | 0.00     | -3.71                                         | 0.00     |
| Amino acid | Citrulline               | -0.27                                         | 0.58     | 1.76                                          | 0.01     | -0.39                                         | 0.04     | -0.33                                         | 0.22     | -0.25                                         | 0.05     | -0.29                                         | 0.02     | -0.08                                         | 0.47     | 0.31                                          | 0.51     | 0.06                                          | 0.91     |
| Amino acid | Creatine                 | -0.31                                         | 0.57     | -1.68                                         | 0.00     | -0.47                                         | 0.05     | -0.82                                         | 0.01     | -0.35                                         | 0.18     | -1.12                                         | 0.01     | 0.05                                          | 0.26     | -0.37                                         | 0.03     | -0.7                                          | 0.01     |
| Amino acid | Creatinine               | -                                             | -        | -0.12                                         | 0.18     | 0.1                                           | 0.73     | -0.46                                         | 0.04     | -0.38                                         | 0.06     | -0.36                                         | 0.15     | -0.13                                         | 0.44     | 0.31                                          | 0.37     | -0.2                                          | 0.28     |
| Amino acid | Gamma-Aminobutyric acid  | -0.93                                         | 0.00     | -1.75                                         | 0.00     | -0.74                                         | 0.00     | -0.16                                         | 0.14     | -0.09                                         | 0.15     | -0.2                                          | 0.14     | -0.21                                         | 0.71     | 0.02                                          | 0.87     | -0.52                                         | 0.00     |
| Amino acid | Glycine                  | -1.26                                         | 0.00     | -2.08                                         | 0.00     | -0.99                                         | 0.00     | -                                             | -        | -                                             | -        | -                                             | -        | -                                             | -        | -                                             | -        | -                                             | -        |

|            |                       |        |          |       |          |       |          |       |          |       |          |       |          |       |          |       |          |       |          |
|------------|-----------------------|--------|----------|-------|----------|-------|----------|-------|----------|-------|----------|-------|----------|-------|----------|-------|----------|-------|----------|
| Amino acid | Hypotaurine           | 0.29   | 0.3<br>0 | -0.35 | 0.1<br>0 | -0.61 | 0.0<br>3 | 0.25  | 0.5<br>5 | -0.2  | 0.0<br>7 | -0.54 | 0.0<br>0 | -0.72 | 0.0<br>2 | -0.55 | 0.0<br>0 | -1.26 | 0.0<br>0 |
| Amino acid | L-Alanine             | -0.83  | 0.0<br>0 | -1.66 | 0.0<br>0 | -0.91 | 0.0<br>1 | -     | -        | -     | -        | -     | -        | -     | -        | -     | -        | -     | -        |
| Amino acid | L-Arginine            | 6.65   | 0.0<br>0 | -0.46 | 0.0<br>2 | -0.07 | 0.5<br>6 | -0.08 | 0.5<br>6 | -0.14 | 0.6<br>5 | 0.25  | 0.3<br>6 | 0.02  | 0.4<br>9 | 0.25  | 0.0<br>6 | -0.19 | 0.0<br>8 |
| Amino acid | L-Asparagine          | 0.3    | 0.3<br>3 | -0.38 | 0.2<br>2 | 0.99  | 0.0<br>4 | -     | -        | -     | -        | -     | -        | 0.9   | 0.1<br>6 | 1.07  | 0.1<br>3 | 1.31  | 0.1<br>3 |
| Amino acid | L-Aspartic acid       | -0.64  | 0.0<br>4 | -2.2  | 0.0<br>0 | -1.38 | 0.0<br>0 | 0.32  | 0.0<br>7 | 0.33  | 0.2<br>7 | 0.79  | 0.0<br>2 | -0.14 | 0.8<br>9 | -0.5  | 0.0<br>1 | -1.62 | 0.0<br>0 |
| Amino acid | L-Cystathionine       | 5.15   | 0.0<br>0 | -2.06 | 0.0<br>0 | -0.32 | 0.1<br>2 | -0.13 | 0.9<br>3 | 1.19  | 0.4<br>2 | 0.79  | 0.6<br>4 | -1.68 | 0.0<br>0 | -2.2  | 0.0<br>0 | -3.8  | 0.0<br>0 |
| Amino acid | L-Glutamic acid       | -1.26  | 0.0<br>0 | -2.08 | 0.0<br>0 | -1.3  | 0.0<br>0 | -0.35 | 0.5<br>3 | -0.71 | 0.0<br>2 | -1.14 | 0.0<br>0 | -0.4  | 0.1<br>1 | -0.49 | 0.0<br>3 | -2.06 | 0.0<br>0 |
| Amino acid | L-Glutamine           | -11.37 | 0.0<br>2 | -0.97 | 0.0<br>0 | -0.38 | 0.0<br>6 | -0.05 | 0.2<br>0 | 0.17  | 0.4<br>3 | -0.09 | 0.7<br>1 | -0.21 | 0.0<br>3 | -0.32 | 0.0<br>0 | -0.51 | 0.0<br>0 |
| Amino acid | L-Isoleucine          | -      | -        | -1.49 | 0.2<br>7 | -0.59 | 0.9<br>7 | -1.39 | 0.9<br>8 | 1.52  | 0.3<br>1 | -0.28 | 0.6<br>5 | 0.07  | 0.1<br>8 | -0.56 | 0.7<br>3 | 0.12  | 0.9<br>5 |
| Amino acid | L-Leucine             | -      | -        | -1.39 | 0.0<br>0 | -0.41 | 0.1<br>2 | 0.22  | 0.4<br>0 | -     | -        | -0.5  | 0.0<br>7 | -     | -        | -0.63 | 0.0<br>4 | -1.31 | 0.0<br>0 |
| Amino acid | L-Lysine              | -1.11  | 0.0<br>1 | -1.04 | 0.0<br>2 | -0.42 | 0.3<br>4 | -0.3  | 0.0<br>7 | -0.41 | 0.1<br>2 | 0.09  | 0.4<br>7 | 0.18  | 0.2<br>5 | 0.28  | 0.0<br>1 | -0.35 | 0.0<br>0 |
| Amino acid | L-Methionine          | -0.93  | 0.0<br>0 | -2.25 | 0.0<br>0 | -1.04 | 0.0<br>0 | -0.07 | 0.2<br>3 | -0.31 | 0.0<br>3 | -0.39 | 0.1<br>1 | 0.06  | 0.9<br>6 | -0.14 | 0.2<br>3 | -0.87 | 0.0<br>0 |
| Amino acid | L-Ornithine           | -      | -        | -     | -        | -     | -        | -     | -        | -     | -        | -     | -        | 0.18  | 0.5<br>5 | 0.29  | 0.0<br>8 | -0.12 | 0.6<br>6 |
| Amino acid | L-Phenylalanine       | -1.31  | 0.7<br>4 | -     | -        | -     | -        | -0.12 | 0.3<br>6 | -0.37 | 0.0<br>3 | -0.28 | 0.0<br>5 | -0.18 | 0.8<br>6 | -0.32 | 0.1<br>9 | -0.72 | 0.0<br>0 |
| Amino acid | L-Proline             | -1.26  | 0.0<br>0 | 2.04  | 0.1<br>2 | -0.33 | 0.5<br>3 | 0.07  | 0.6<br>4 | -0.25 | 0.4<br>4 | -0.39 | 0.1<br>4 | -     | -        | -     | -        | -     | -        |
| Amino acid | L-Serine              | 2.18   | 0.0<br>0 | 2.52  | 0.0<br>0 | 2.09  | 0.0<br>0 | 0.25  | 0.2<br>3 | 0.33  | 0.4<br>5 | 0.88  | 0.0<br>0 | -0.09 | 0.6<br>9 | -0.33 | 0.0<br>1 | -0.97 | 0.0<br>0 |
| Amino acid | L-Tryptophan          | -1.57  | 0.0<br>0 | -2.36 | 0.0<br>0 | -1.34 | 0.0<br>0 | -0.33 | 0.0<br>7 | -0.77 | 0.0<br>3 | -0.91 | 0.0<br>1 | -0.27 | 0.4<br>8 | -0.75 | 0.0<br>2 | -0.84 | 0.0<br>0 |
| Amino acid | L-Tyrosine            | 0.08   | 0.7<br>1 | -2.29 | 0.0<br>0 | -1.25 | 0.0<br>0 | -0.35 | 0.0<br>3 | -0.51 | 0.0<br>0 | -0.55 | 0.0<br>2 | 0.11  | 0.0<br>2 | -0.36 | 0.1<br>3 | -1    | 0.0<br>1 |
| Amino acid | L-Valine              | -1.16  | 0.0<br>0 | -1.41 | 0.0<br>0 | -0.56 | 0.0<br>1 | 0.12  | 0.5<br>8 | 0.09  | 0.9<br>1 | 0.36  | 0.9<br>6 | 0.07  | 0.8<br>4 | 0.21  | 0.9<br>7 | 0.58  | 0.4<br>0 |
| Amino acid | N-a-Acetyl-L-arginine | -      | -        | -1.61 | 0.0<br>0 | -0.64 | 0.0<br>1 | 0.49  | 0.5<br>2 | -0.19 | 0.3<br>6 | -0.55 | 0.1<br>3 | -0.34 | 0.2<br>2 | 0     | 0.5<br>0 | -0.39 | 0.0<br>2 |



|                 |                                  |       |          |       |          |       |          |       |          |       |          |       |          |       |          |       |          |       |          |
|-----------------|----------------------------------|-------|----------|-------|----------|-------|----------|-------|----------|-------|----------|-------|----------|-------|----------|-------|----------|-------|----------|
| Amino acid      | N-Acetylaspartyl glutamic acid   | -0.53 | 0.1<br>1 | -1.53 | 0.0<br>0 | -0.68 | 0.0<br>7 | 0.2   | 0.6<br>8 | -0.27 | 0.3<br>9 | -0.06 | 0.1<br>9 | -1.29 | 0.0<br>1 | -0.83 | 0.0<br>0 | -2.86 | 0.0<br>0 |
| Amino acid      | N-Acetyl isoleucine              | -0.13 | 0.0<br>2 | 0.25  | 0.0<br>9 | -0.05 | 0.5<br>2 | 2.42  | 0.3<br>6 | 0.37  | 0.7<br>7 | 1.37  | 0.4<br>9 | 0.02  | 0.6<br>4 | 0.13  | 0.0<br>2 | 0.11  | 0.2<br>0 |
| Amino acid      | N-Acetyl leucine                 | -     | -        | 0.87  | 0.6<br>5 | 0.44  | 0.7<br>4 | -     | -        | 0.43  | 0.5<br>9 | -     | -        | -     | -        | -     | -        | 0.7   | 0.4<br>5 |
| Amino acid      | N-Acetyl taurine                 | -0.37 | 0.0<br>5 | -0.82 | 0.0<br>0 | -0.65 | 0.0<br>1 | 0.14  | 0.9<br>1 | -0.16 | 0.2<br>2 | -5.89 | 0.0<br>2 | -0.74 | 0.1<br>3 | -0.7  | 0.0<br>1 | -1.08 | 0.0<br>0 |
| Amino acid      | Ornithine                        | 4.83  | 0.0<br>0 | -0.4  | 0.2<br>5 | -0.23 | 0.2<br>2 | -0.54 | 0.0<br>8 | -0.61 | 0.0<br>1 | -0.26 | 0.1<br>9 | 0.18  | 0.5<br>5 | 0.29  | 0.0<br>8 | -0.12 | 0.6<br>6 |
| Amino acid      | Pyroglutamic acid                | -10.3 | 0.0<br>2 | -0.73 | 0.0<br>3 | -0.17 | 0.5<br>1 | -0.05 | 0.2<br>0 | 0.19  | 0.4<br>2 | -0.29 | 0.5<br>6 | -0.25 | 0.0<br>1 | -0.34 | 0.0<br>1 | -0.61 | 0.0<br>0 |
| Amino acid      | Taurine                          | -0.37 | 0.0<br>5 | -0.82 | 0.0<br>0 | -0.65 | 0.0<br>1 | 0.14  | 0.9<br>1 | -0.16 | 0.2<br>2 | -5.89 | 0.0<br>2 | -0.74 | 0.1<br>3 | -0.7  | 0.0<br>1 | -1.08 | 0.0<br>0 |
| Amino acid      | Thiamine                         | 5.36  | 0.3<br>8 | -1.22 | 0.0<br>0 | -0.87 | 0.0<br>0 | -1.15 | 0.0<br>1 | -0.44 | 0.0<br>5 | -0.31 | 0.2<br>5 | -0.3  | 0.4<br>7 | -0.15 | 0.4<br>3 | -1.07 | 0.0<br>0 |
| Amino acid      | Threonine                        | 0.06  | 0.3<br>6 | 1.4   | 0.5<br>0 | 0.57  | 0.9<br>4 | -1.9  | 0.6<br>0 | -0.52 | 0.0<br>9 | 0.64  | 0.5<br>1 | -0.22 | 0.6<br>6 | -0.3  | 0.0<br>8 | 0.67  | 0.3<br>4 |
| Benzenoid       | Benzoic acid                     | 0.64  | 0.8<br>6 | 0.3   | 0.4<br>3 | 0.11  | 0.4<br>3 | 0.39  | 0.0<br>2 | 0.13  | 0.5<br>6 | 0.34  | 0.3<br>9 | -0.17 | 0.2<br>5 | -0.24 | 0.0<br>4 | 0.76  | 0.0<br>1 |
| Carbohydrate    | D-Glucose                        | -0.23 | 0.9<br>4 | 0.96  | 0.0<br>2 | 0.21  | 0.2<br>3 | -0.21 | 0.3<br>8 | -0.37 | 0.0<br>4 | 0.09  | 0.1<br>7 | 1.09  | 0.0<br>3 | 0.92  | 0.0<br>0 | 0.84  | 0.0<br>0 |
| Carbohydrate    | Glyceraldehyde 3-phosphate       | -1.45 | 0.0<br>0 | -2.31 | 0.0<br>0 | -1.43 | 0.0<br>0 | 0.22  | 0.2<br>7 | -0.22 | 0.1<br>8 | -1.31 | 0.0<br>2 | 0.19  | 0.8<br>6 | -0.26 | 0.2<br>8 | -1.7  | 0.0<br>0 |
| Carbohydrate    | Mannose 6-phosphate              | -0.32 | 0.2<br>0 | -0.72 | 0.0<br>9 | -0.2  | 0.3<br>0 | 0.78  | 0.0<br>1 | 0.01  | 0.8<br>7 | 0.22  | 0.3<br>1 | 0.33  | 0.0<br>1 | 0.67  | 0.0<br>0 | 0.47  | 0.0<br>2 |
| Carbohydrate    | N-Acetyl-glucosamine 1-phosphate | -1.31 | 0.0<br>0 | -2.41 | 0.0<br>0 | -1.56 | 0.0<br>0 | -0.14 | 0.0<br>9 | -0.63 | 0.0<br>0 | -1.21 | 0.0<br>0 | -     | -        | -     | -        | -     | -        |
| Carbohydrate    | Threonic acid                    | -0.73 | 0.0<br>3 | -0.91 | 0.0<br>1 | -0.3  | 0.6<br>8 | -0.53 | 0.0<br>4 | -0.33 | 0.1<br>1 | -0.78 | 0.0<br>2 | -0.51 | 0.0<br>1 | -0.59 | 0.0<br>0 | -1.62 | 0.0<br>0 |
| Carboxylic acid | 5-L-Glutamyl-taurine             | 2.22  | 0.0<br>1 | 1.24  | 0.0<br>1 | 2.07  | 0.0<br>0 | -     | -        | -     | -        | -     | -        | -     | -        | -     | -        | -     | -        |
| Carboxylic acid | Citric acid                      | -0.43 | 0.0<br>8 | -1.27 | 0.0<br>0 | -0.3  | 0.2<br>0 | 0.1   | 0.8<br>1 | -0.23 | 0.9<br>4 | -     | -        | -     | -        | -     | -        | -0.91 | 0.0<br>0 |
| Carboxylic acid | Dodecanedioic acid               | 0.42  | 0.7<br>0 | 0.65  | 0.0<br>6 | 0.47  | 0.0<br>9 | 1.82  | 0.4<br>0 | 0.07  | 0.6<br>6 | -1.08 | 0.6<br>3 | 0.25  | 0.3<br>3 | 0.28  | 0.1<br>5 | 0.43  | 0.1<br>1 |



|                 |                            |        |      |       |      |       |      |       |      |       |      |       |      |       |      |       |      |       |      |
|-----------------|----------------------------|--------|------|-------|------|-------|------|-------|------|-------|------|-------|------|-------|------|-------|------|-------|------|
| Carboxylic acid | Fumaric acid               | -      | -    | -     | -    | -     | -    | -     | -    | -     | -    | -     | -    | 0.3   | 0.16 | 0.11  | 0.09 | -2.33 | 0.00 |
| Carboxylic acid | L-Lactic acid              | -0.58  | 0.02 | -0.45 | 0.07 | 0.41  | 0.26 | 0.05  | 0.65 | -0.37 | 0.04 | -0.46 | 0.09 | -0.08 | 0.84 | 0.1   | 0.27 | -0.93 | 0.00 |
| Carboxylic acid | Phthalic acid              | -      | -    | -1.55 | 0.00 | -0.68 | 0.47 | -0.52 | 0.65 | 0.66  | 0.34 | -     | -    | -     | -    | -     | -    | -     | -    |
| Carboxylic acid | Pyruvic acid               | -0.69  | 0.01 | -0.99 | 0.00 | -0.64 | 0.00 | 1.74  | 0.45 | -0.33 | 0.95 | -0.01 | 0.10 | -0.51 | 0.01 | -0.61 | 0.00 | -1.22 | 0.00 |
| Carboxylic acid | Succinic acid              | -0.87  | 0.11 | -1.21 | 0.05 | -0.64 | 0.25 | -     | -    | -     | -    | -     | -    | -     | -    | -     | -    | -     | -    |
| Carboxylic acid | Tetradecanedioic acid      | -0.36  | 0.10 | -0.22 | 0.28 | -0.56 | 0.04 | -     | -    | -     | -    | -     | -    | 0.17  | 0.43 | 0.12  | 0.53 | 0.21  | 0.11 |
| Carnitine       | 2-Methylbutyroyl carnitine | -0.71  | 0.00 | -1.99 | 0.00 | -1.15 | 0.00 | 0.06  | 0.98 | -0.36 | 0.02 | -0.9  | 0.00 | -0.3  | 0.10 | -1.16 | 0.00 | -3.31 | 0.00 |
| Carnitine       | Butenylcarnitine           | -      | -    | 1.09  | 0.29 | -0.16 | 0.60 | 1.2   | 0.00 | 1.88  | 0.00 | 2.94  | 0.01 | 1.11  | 0.30 | 1.5   | 0.00 | 1.19  | 0.01 |
| Carnitine       | Decanoylcarnitine          | 0.41   | 0.81 | -0.09 | 0.97 | 0.22  | 0.97 | 0.04  | 0.90 | -1.42 | 0.31 | 1.01  | 0.89 | -1.45 | 0.60 | -0.9  | 0.59 | -0.71 | 0.96 |
| Carnitine       | Dodecanedioyl carnitine    | -1.31  | 0.38 | 0.61  | 0.11 | 0.01  | 0.95 | 2.94  | 0.47 | 0.86  | 0.59 | -     | -    | 1.22  | 0.02 | 1.13  | 0.04 | 1.77  | 0.00 |
| Carnitine       | Heptadecanoyl carnitine    | -      | -    | -1.82 | 0.37 | 1.25  | 0.00 | 0.24  | 0.72 | -0.97 | 0.06 | -0.38 | 0.33 | 0.67  | 0.68 | 0.24  | 0.84 | 1.2   | 0.04 |
| Carnitine       | L-Carnitine                | -0.17  | 0.82 | 0.03  | 0.54 | -0.35 | 0.11 | -0.38 | 0.40 | 0.39  | 0.79 | 1.69  | 0.58 | 1.07  | 0.05 | 0.53  | 0.07 | 0.98  | 0.00 |
| Carnitine       | L-Hexanoylcarnitine        | 0.56   | 0.55 | 1.38  | 0.27 | -0.03 | 1.00 | -0.37 | 0.12 | -1.3  | 0.00 | -1.62 | 0.00 | -0.88 | 0.00 | 1.75  | 0.00 | 1.71  | 0.00 |
| Carnitine       | L-Palmitoylcarnitine       | -8.48  | 0.19 | 0.34  | 0.53 | 0.47  | 0.49 | 0.13  | 0.86 | -0.89 | 0.13 | -0.92 | 0.11 | 0.05  | 0.69 | 1.24  | 0.09 | 1.63  | 0.03 |
| Carnitine       | Pentadecanoyl carnitine    | -1.63  | 0.15 | -0.49 | 0.14 | 0.03  | 0.92 | 0.72  | 0.21 | -     | -    | -1.17 | 0.84 | -1.05 | 0.09 | -2.71 | 0.00 | -1.37 | 0.02 |
| Carnitine       | Propionylcarnitine         | -15.38 | 0.00 | -1.42 | 0.21 | -0.65 | 0.63 | 0.12  | 0.85 | 0.17  | 0.86 | -0.87 | 0.00 | 0.14  | 0.61 | -0.89 | 0.02 | -2.79 | 0.00 |
| Carnitine       | Stearoylcarnitine          | -1.15  | 0.85 | 2.03  | 0.01 | 2.42  | 0.06 | -0.37 | 0.91 | -1.02 | 0.17 | -0.68 | 0.21 | 1.09  | 0.21 | 1.6   | 0.03 | 2.06  | 0.01 |
| Carnitine       | Tiglylcarnitine            | -0.41  | 0.11 | -0.29 | 0.02 | 0.22  | 0.40 | 0.04  | 0.87 | -0.15 | 0.07 | -0.46 | 0.04 | 0.05  | 0.30 | 0.09  | 0.31 | -1.88 | 0.00 |

|                    |                                 |       |          |       |          |       |          |       |          |       |          |       |          |       |          |       |          |       |          |
|--------------------|---------------------------------|-------|----------|-------|----------|-------|----------|-------|----------|-------|----------|-------|----------|-------|----------|-------|----------|-------|----------|
| Carnitine          | trans-2-Dodecenoylcarnitine     | -0.98 | 0.5<br>5 | 0.81  | 0.7<br>8 | -0.53 | 0.1<br>8 | -0.57 | 0.7<br>8 | -0.35 | 0.0<br>7 | 0.32  | 0.3<br>3 | -0.88 | 0.0<br>2 | -0.53 | 0.0<br>7 | -0.82 | 0.0<br>0 |
| Carnitine          | trans-Hexadec-2-enoyl carnitine | -     | -        | -0.74 | 0.0<br>5 | 0.39  | 0.9<br>3 | 0.2   | 0.7<br>5 | -0.91 | 0.1<br>9 | -0.51 | 0.2<br>9 | -0.76 | 0.1<br>1 | -1.24 | 0.0<br>1 | -1.18 | 0.0<br>1 |
| Ceramide           | Cer(d18:1/16:0)                 | -0.62 | 0.2<br>2 | -2.41 | 0.0<br>2 | -0.66 | 0.0<br>9 | 0.42  | 0.9<br>3 | -1.65 | 0.1<br>1 | -1.28 | 0.1<br>5 | -1.47 | 0.0<br>2 | -     | -        | -2.71 | 0.0<br>0 |
| Ceramide           | Cer(d18:1/24:1(15Z))            | -2.34 | 0.1<br>4 | -2.65 | 0.0<br>2 | -3.01 | 0.0<br>7 | -     | -        | -     | -        | -     | -        | -1.52 | 0.1<br>2 | -3.55 | 0.0<br>1 | -3.72 | 0.0<br>1 |
| Cholesterol ester  | Cholesteryl acetate             | -1.41 | 0.6<br>2 | -0.91 | 0.0<br>4 | -0.8  | 0.1<br>8 | -0.09 | 0.1<br>6 | -0.4  | 0.1<br>0 | -1.31 | 0.0<br>0 | -     | -        | -     | -        | -     | -        |
| Fatty acid         | Glycerol 3-phosphate            | -1    | 0.0<br>0 | -1.57 | 0.0<br>0 | -0.66 | 0.0<br>1 | -0.56 | 0.1<br>1 | -0.79 | 0.1<br>4 | -2    | 0.0<br>0 | -0.11 | 0.6<br>1 | 0.02  | 0.9<br>3 | -0.77 | 0.0<br>2 |
| Fatty acid         | Linoleamide                     | -2.79 | 0.1<br>2 | -1.52 | 0.6<br>3 | -0.07 | 0.9<br>7 | -0.06 | 0.5<br>6 | -3.04 | 0.0<br>4 | 0.04  | 0.6<br>8 | -1.17 | 0.3<br>8 | -0.8  | 0.3<br>6 | -1.23 | 0.2<br>9 |
| Fatty acid         | Stearic acid                    | -0.4  | 0.4<br>7 | 0.43  | 0.4<br>4 | -0.27 | 0.5<br>9 | 0.24  | 0.7<br>6 | 0.72  | 0.8<br>0 | 0.74  | 0.7<br>2 | 0.25  | 0.4<br>5 | 0.31  | 0.1<br>0 | 0.74  | 0.0<br>0 |
| Fatty acid         | Stearoylethanolamide            | -     | -        | -     | -        | -     | -        | -     | -        | -1.21 | 0.0<br>3 | -1.25 | 0.0<br>3 | -0.78 | 0.5<br>9 | -1.33 | 0.1<br>7 | -1.38 | 0.1<br>3 |
| Fatty acid         | Tetraglyme                      | -     | -        | 0.72  | 0.1<br>1 | -2.02 | 0.0<br>4 | 0.82  | 0.3<br>9 | 0.68  | 0.8<br>2 | 2.35  | 0.1<br>8 | 0.73  | 0.0<br>8 | 0.38  | 0.0<br>1 | 0.89  | 0.0<br>0 |
| Fatty amide        | Oleamide                        | -2.79 | 0.1<br>2 | -1.52 | 0.6<br>3 | -0.07 | 0.9<br>7 | -0.06 | 0.5<br>6 | -3.04 | 0.0<br>4 | 0.04  | 0.6<br>8 | -1.17 | 0.3<br>8 | -0.8  | 0.3<br>6 | -1.23 | 0.2<br>9 |
| Furanone           | Ascorbic acid                   | -0.03 | 0.9<br>6 | -0.83 | 0.0<br>3 | -0.21 | 0.2<br>4 | 1.34  | 0.4<br>9 | -     | -        | 1.43  | 0.3<br>4 | -2.16 | 0.0<br>0 | -1.55 | 0.0<br>0 | -0.25 | 0.0<br>9 |
| Inorganic compound | Pyrophosphate                   | -0.04 | 0.2<br>9 | 0.93  | 0.0<br>1 | 0.48  | 0.1<br>9 | 0.55  | 0.3<br>1 | 0.63  | 0.1<br>5 | 0.94  | 0.0<br>2 | 0.88  | 0.0<br>7 | 1.51  | 0.0<br>1 | 1.67  | 0.0<br>0 |
| Keto acid          | Acetoacetic acid                | 7.66  | 0.0<br>1 | -0.48 | 0.0<br>0 | -0.04 | 0.2<br>3 | -0.07 | 0.3<br>9 | -0.21 | 0.0<br>5 | -0.69 | 0.0<br>0 | -0.17 | 0.3<br>4 | -0.42 | 0.0<br>2 | -1.47 | 0.0<br>0 |
| Keto acid          | alpha-Ketoglutaric acid         | -0.39 | 0.0<br>1 | -1.35 | 0.0<br>0 | 0.35  | 0.0<br>1 | 0.49  | 0.0<br>1 | 0.12  | 0.2<br>0 | -0.3  | 0.1<br>3 | -0.64 | 0.0<br>0 | -0.35 | 0.0<br>4 | -0.62 | 0.0<br>1 |
| Keto acid          | Levulinic acid                  | -     | -        | -     | -        | -     | -        | -     | -        | -1.14 | 0.0<br>1 | -0.57 | 0.0<br>3 | -1.08 | 0.0<br>9 | -0.77 | 0.0<br>1 | -2.36 | 0.0<br>0 |
| Nucleobase         | Adenine                         | -1.24 | 0.0<br>0 | -1.92 | 0.0<br>0 | -0.76 | 0.0<br>1 | -     | -        | -     | -        | -     | -        | -0.27 | 0.1<br>6 | -1.61 | 0.0<br>0 | -5.17 | 0.0<br>0 |
| Nucleoside         | 2'-Deoxycytidine                | -     | -        | -     | -        | -     | -        | -     | -        | -     | -        | -     | -        | -0.4  | 0.5<br>4 | -0.09 | 0.6<br>5 | -0.9  | 0.0<br>0 |
| Nucleoside         | 5'-Methylthioadenosine          | -0.95 | 0.2<br>1 | -1.43 | 0.0<br>0 | -0.76 | 0.0<br>0 | -1.54 | 0.1<br>9 | -0.39 | 0.5<br>8 | -0.79 | 0.8<br>3 | -0.56 | 0.0<br>5 | -0.73 | 0.0<br>0 | -0.89 | 0.0<br>0 |

|            |                                                        |       |          |       |          |       |          |       |          |       |          |       |          |       |          |       |          |       |          |
|------------|--------------------------------------------------------|-------|----------|-------|----------|-------|----------|-------|----------|-------|----------|-------|----------|-------|----------|-------|----------|-------|----------|
| Nucleoside | Adenosine                                              | -0.95 | 0.2<br>1 | 0.86  | 0.0<br>1 | 1.1   | 0.1<br>2 | -1.54 | 0.1<br>9 | -0.39 | 0.5<br>8 | -0.79 | 0.8<br>3 | -0.56 | 0.0<br>5 | -0.73 | 0.0<br>0 | -0.89 | 0.0<br>0 |
| Nucleoside | Thymidine                                              | -     | -        | -     | -        | -     | -        | -     | -        | -     | -        | -     | -        | -0.25 | 0.2<br>1 | 0.17  | 0.8<br>8 | -2.14 | 0.0<br>3 |
| Nucleotide | 3'-AMP                                                 | -     | -        | 0.86  | 0.0<br>1 | 1.1   | 0.1<br>2 | -     | -        | -     | -        | -     | -        | -     | -        | -     | -        | 0.44  | 0.9<br>4 |
| Nucleotide | CDP-ethanolamine                                       | -     | -        | -     | -        | -     | -        | -     | -        | -     | -        | -     | -        | 2.51  | 0.0<br>0 | -     | -        | 2.85  | 0.0<br>0 |
| Nucleotide | Cytidine<br>5'-diphosphocholine                        | -     | -        | -     | -        | -     | -        | -     | -        | -     | -        | -     | -        | 1.41  | 0.0<br>0 | 1.67  | 0.0<br>0 | 1.25  | 0.0<br>1 |
| Nucleotide | NAD                                                    | 4.71  | 0.2<br>7 | -1.48 | 0.0<br>0 | -0.55 | 0.0<br>4 | 0.54  | 0.2<br>4 | -0.03 | 0.1<br>8 | -0.45 | 0.0<br>1 | -0.27 | 0.1<br>6 | -0.59 | 0.0<br>0 | -0.95 | 0.0<br>0 |
| Nucleotide | NADH                                                   | -0.5  | 0.0<br>2 | -1.18 | 0.0<br>0 | -0.48 | 0.0<br>5 | -     | -        | -     | -        | -4.74 | 0.0<br>0 | -     | -        | -     | -        | -     | -        |
| Nucleotide | Uridine                                                | -0.82 | 0.0<br>2 | -1.87 | 0.0<br>0 | -1.03 | 0.0<br>1 | 0.42  | 0.3<br>6 | -1.05 | 0.4<br>3 | -1.99 | 0.0<br>1 | -0.64 | 0.0<br>5 | -0.71 | 0.0<br>2 | -1.01 | 0.0<br>0 |
| Nucleotide | Uridine<br>5'-diphosphogalactose                       | -     | -        | -     | -        | -     | -        | -0.05 | 0.2<br>4 | -0.22 | 0.0<br>7 | -0.84 | 0.0<br>1 | -     | -        | -     | -        | -     | -        |
| Nucleotide | Uridine 5'-<br>diphosphoglucuronic<br>acid             | -0.6  | 0.0<br>0 | -1.41 | 0.0<br>0 | -0.95 | 0.0<br>0 | 0.11  | 0.7<br>7 | -     | -        | -     | -        | -0.54 | 0.0<br>2 | -0.9  | 0.0<br>0 | -1.94 | 0.0<br>0 |
| Nucleotide | Uridine diphosphate-<br>N-acetylglucosamine            | -0.49 | 0.0<br>3 | -1.99 | 0.0<br>0 | -1.37 | 0.0<br>0 | -0.86 | 0.0<br>4 | -0.66 | 0.0<br>3 | -1.69 | 0.0<br>0 | -0.51 | 0.0<br>3 | -1.03 | 0.0<br>0 | -2.03 | 0.0<br>0 |
| Nucleotide | Uridine<br>diphosphategalactose                        | -0.91 | 0.0<br>2 | -1.44 | 0.0<br>0 | -0.58 | 0.0<br>1 | -     | -        | -     | -        | -     | -        | -0.72 | 0.0<br>2 | -1.13 | 0.0<br>0 | -2.66 | 0.0<br>0 |
| PC         | 1,2-Dipalmitoleoyl-sn-<br>glycero-3-<br>phosphocholine | -     | -        | -3.11 | 0.0<br>1 | -2.79 | 0.0<br>3 | 0.47  | 0.2<br>5 | -1.75 | 0.1<br>3 | -1.31 | 0.0<br>6 | -     | -        | -     | -        | -     | -        |
| PC         | LysoPC(14:1(9Z)/0:0)                                   | -1.74 | 0.5<br>8 | -3.65 | 0.0<br>0 | -2.42 | 0.0<br>1 | -     | -        | -     | -        | -     | -        | -     | -        | -     | -        | -     | -        |
| PC         | LysoPC(24:1(15Z))                                      | -2.41 | 0.5<br>3 | -2.05 | 0.0<br>4 | -1.76 | 0.1<br>7 | 0.75  | 0.3<br>0 | -1.42 | 0.2<br>2 | -2.09 | 0.0<br>5 | -2.55 | 0.0<br>3 | -4.21 | 0.0<br>0 | -3.98 | 0.0<br>1 |
| PC         | LysoPC(P-16:0/0:0)                                     | -1.87 | 0.3<br>1 | -0.97 | 0.1<br>1 | -1.33 | 0.2<br>0 | -     | -        | -     | -        | -     | -        | -1.88 | 0.0<br>5 | -3.34 | 0.0<br>1 | -3.25 | 0.0<br>1 |
| PC         | PC(16:0/18:1(9Z))                                      | -     | -        | -0.82 | 0.2<br>2 | -0.68 | 0.7<br>6 | 0.42  | 0.2<br>7 | -1.48 | 0.2<br>6 | -1.24 | 0.0<br>5 | -0.62 | 0.1<br>3 | -2.79 | 0.0<br>0 | -2.88 | 0.0<br>0 |
| PC         | PC(16:0/18:3<br>(9Z,12Z,15Z))                          | -4.22 | 0.3<br>1 | -0.46 | 0.1<br>1 | -1.24 | 0.1<br>2 | 0.45  | 0.2<br>4 | -     | -        | -     | -        | -0.48 | 0.3<br>3 | -1.25 | 0.0<br>1 | -1.52 | 0.0<br>3 |

|              |                                                      |       |          |       |          |       |          |       |          |       |          |       |          |       |          |       |          |       |          |
|--------------|------------------------------------------------------|-------|----------|-------|----------|-------|----------|-------|----------|-------|----------|-------|----------|-------|----------|-------|----------|-------|----------|
| PC           | PC(18:1(9Z)e/2:0)                                    | -     | -        | -0.49 | 0.1<br>4 | -1.53 | 0.1<br>4 | 0.52  | 0.4<br>9 | -1.36 | 0.1<br>4 | -1.86 | 0.0<br>1 | -2.8  | 0.0<br>3 | -3.98 | 0.0<br>0 | -3.3  | 0.0<br>1 |
| PE           | 1-oleoyl-2-linoleyl-sn-glycero-3-phosphoethanolamine | -0.81 | 0.0<br>7 | -2.51 | 0.0<br>0 | -1.81 | 0.0<br>0 | -     | -        | -     | -        | -     | -        | -0.58 | 0.2<br>7 | -1.57 | 0.0<br>2 | -3.21 | 0.0<br>0 |
| PE           | 1-Palmitoyl-2-linoleoyl PE                           | -0.81 | 0.0<br>7 | -2.65 | 0.0<br>0 | -1.61 | 0.0<br>1 | 0.02  | 0.8<br>5 | -0.88 | 0.2<br>6 | -0.29 | 0.4<br>6 | -     | -        | -     | -        | -     | -        |
| PE           | LysoPE(18:0/0:0)                                     | -     | -        | -1.93 | 0.3<br>4 | -1.02 | 0.3<br>7 | -     | -        | -     | -        | -1.17 | 0.1<br>5 | -2.13 | 0.0<br>3 | -2.82 | 0.0<br>0 | -1.44 | 0.0<br>6 |
| PE           | LysoPE(18:1(9Z)/0:0)                                 | -1.23 | 0.0<br>1 | -2.06 | 0.0<br>0 | -1.09 | 0.0<br>0 | 0.79  | 0.1<br>2 | -     | -        | -     | -        | -     | -        | -     | -        | -     | -        |
| PE           | PE(16:0/22:6 (4Z,7Z,10Z,13Z,16Z,19Z))                | -0.05 | 0.7<br>2 | -0.68 | 0.0<br>1 | -0.12 | 0.2<br>8 | -     | -        | -1.27 | 0.5<br>5 | -     | -        | -     | -        | -     | -        | -     | -        |
| PE           | PE(18:0/20:4 (5Z,8Z,11Z,14Z))                        | -     | -        | -0.1  | 0.1<br>4 | 0.15  | 0.1<br>3 | 1.43  | 0.3<br>2 | -0.51 | 0.4<br>0 | 0.17  | 0.6<br>2 | 2.08  | 0.4<br>0 | 1.74  | 0.7<br>2 | 1.64  | 0.4<br>1 |
| PE           | PE(P-16:0/20:4 (5Z,8Z,11Z,14Z))                      | 0.51  | 0.7<br>2 | 0.04  | 0.4<br>7 | 0.6   | 0.4<br>8 | -     | -        | -0.34 | 0.1<br>5 | -     | -        | -     | -        | -     | -        | -     | -        |
| Peptide      | Carnosine                                            | 5.16  | 0.0<br>0 | -0.22 | 0.4<br>2 | 0.04  | 0.7<br>8 | -0.15 | 0.2<br>7 | -0.44 | 0.0<br>1 | -0.36 | 0.0<br>3 | -0.93 | 0.0<br>4 | -1.16 | 0.0<br>0 | -1.53 | 0.0<br>0 |
| Peptide      | L-Glutathione (reduced)                              | -1.02 | 0.0<br>0 | -3.26 | 0.0<br>0 | -1.35 | 0.0<br>0 | -0.04 | 0.3<br>7 | -0.29 | 0.1<br>0 | -1.65 | 0.0<br>1 | -0.63 | 0.0<br>1 | -1.24 | 0.0<br>0 | -1.72 | 0.0<br>0 |
| Peptide      | L-Glutathione (oxidized)                             | -     | -        | 1.48  | 0.0<br>1 | -     | -        | 1.24  | 0.1<br>2 | -     | -        | -     | -        | -0.17 | 0.5<br>6 | -     | -        | -     | -        |
| Peptide      | Ophthalmic acid                                      | 5.85  | 0.0<br>8 | -2.18 | 0.0<br>0 | 0.2   | 0.3<br>6 | 0.38  | 0.0<br>0 | 0.52  | 0.0<br>0 | 0.82  | 0.0<br>1 | 1.59  | 0.0<br>0 | 1.62  | 0.0<br>0 | 1.47  | 0.0<br>0 |
| Peptide      | Pro-leu                                              | 8.41  | 0.0<br>0 | -1.03 | 0.0<br>0 | 0.1   | 0.9<br>7 | 0.97  | 0.0<br>0 | 1.22  | 0.0<br>0 | 1.33  | 0.0<br>0 | -0.22 | 0.7<br>3 | -0.11 | 0.6<br>9 | -0.45 | 0.0<br>0 |
| Phenylketone | Kynurenine                                           | -1.65 | 0.2<br>7 | -     | -        | -     | -        | -     | -        | -0.28 | 0.4<br>4 | 1.24  | 0.0<br>8 | -     | -        | -     | -        | -     | -        |
| Polyamine    | N-Acetylputrescine                                   | -1.25 | 0.0<br>0 | -2.83 | 0.0<br>0 | -2.4  | 0.0<br>0 | -     | -        | -     | -        | -     | -        | -     | -        | -     | -        | -     | -        |
| Polyamine    | N1,N12-Diacetyl spermine                             | 1.84  | 0.4<br>0 | 3.11  | 0.0<br>0 | 5.71  | 0.0<br>0 | 3     | 0.0<br>0 | 3.68  | 0.0<br>0 | 4.5   | 0.0<br>0 | 4.79  | 0.0<br>0 | 4.4   | 0.0<br>0 | 5.44  | 0.0<br>0 |
| Polyamine    | N1,N8-Diacetyl spermidine                            | 1.03  | 0.0<br>0 | 0.5   | 0.0<br>0 | 2.15  | 0.0<br>0 | 1.13  | 0.0<br>0 | 1.37  | 0.0<br>0 | 0.71  | 0.0<br>1 | 1.27  | 0.0<br>0 | 0.53  | 0.0<br>0 | 0.5   | 0.0<br>1 |
| Polyamine    | N8-Acetyl spermidine                                 | 8.44  | 0.0<br>2 | 0.73  | 0.0<br>0 | 2.71  | 0.0<br>0 | 1.01  | 0.3<br>2 | 1.22  | 0.0<br>0 | 0.77  | 0.0<br>0 | 1.03  | 0.0<br>0 | 0.62  | 0.0<br>0 | 0.04  | 0.8<br>0 |

|             |                      |       |      |       |      |       |      |       |      |       |      |       |      |       |      |       |      |       |      |
|-------------|----------------------|-------|------|-------|------|-------|------|-------|------|-------|------|-------|------|-------|------|-------|------|-------|------|
| PUFA        | Alpha-Linolenic acid | -     | -    | 0.61  | 0.93 | 1.98  | 0.37 | -0.29 | 0.60 | -1.03 | 0.83 | 0.31  | 0.62 | -1.26 | 0.52 | -1.34 | 0.59 | -1.47 | 0.52 |
| PUFA        | Linolenelaidic acid  | -     | -    | 2.32  | 0.96 | -1.85 | 0.02 | 0.05  | 0.53 | -1.74 | 0.17 | 1.01  | 0.26 | -1.36 | 0.59 | -2.73 | 0.18 | 0.01  | 0.52 |
| Pyridine    | Pyridoxal            | -     | -    | 0.82  | 0.10 | 0.24  | 0.93 | 1.31  | 0.53 | 1.01  | 0.71 | 1.04  | 0.63 | 0.19  | 0.62 | 0.22  | 0.41 | 0.23  | 0.76 |
| Pyridine    | Pyridoxamine         | -1.36 | 0.17 | -1.96 | 0.01 | -0.32 | 0.82 | 1.79  | 0.38 | 0.01  | 0.80 | 0.51  | 0.67 | -0.09 | 0.44 | 0.06  | 0.69 | -0.48 | 0.22 |
| Pyridine    | Pyridoxine           | -0.74 | 0.01 | -1.5  | 0.00 | 6.99  | 0.00 | -     | -    | -     | -    | -1.13 | 0.66 | 0.6   | 0.85 | 1.39  | 0.04 | -     | -    |
| Pyrrolidine | 1-Methyl pyrrolidine | -     | -    | 2.06  | 0.02 | 0.92  | 0.08 | -0.25 | 0.23 | 0.91  | 0.63 | 0.16  | 0.90 | 0.88  | 0.01 | 1.01  | 0.01 | 1.54  | 0.00 |
| Pyrrolidine | Pyrrolidine          | -0.6  | 0.34 | -0.89 | 0.55 | -0.82 | 0.33 | -0.99 | 0.65 | -2.59 | 0.09 | 1.87  | 0.50 | -2.09 | 0.04 | -0.07 | 0.55 | -0.25 | 0.22 |
| SM          | SM(d18:0/14:0)       | -3.11 | 0.13 | -2.31 | 0.04 | -3.1  | 0.10 | -     | -    | -     | -    | -     | -    | -2.34 | 0.02 | -3.86 | 0.00 | -4.08 | 0.00 |
| SM          | SM(d18:1/16:0)       | -4.02 | 0.09 | -5.16 | 0.01 | -3.9  | 0.04 | 1.05  | 0.27 | -1.27 | 0.29 | -1.2  | 0.09 | -2.31 | 0.04 | -3.37 | 0.00 | -4.28 | 0.00 |

Class, name, Log<sub>2</sub> fold change, and the p-value (p) is represented for each compound. PC: phosphocholine; PE: phosphoethanolamine; PUFA: poly unsaturated fatty acid; SM: Sphingomyelin



**Table S8.** Effect scores of enriched metabolic genes in MCF-7, MDA-MB-231 and HCC1937 cells evaluated through the Dependency Map Portal (DepMap) database. Fitness effect score is based on the Chronos algorithm.

| PATHWAY                                            |                                                            |       | MCF7                 | MDA-MB-231           | HCC1937              |
|----------------------------------------------------|------------------------------------------------------------|-------|----------------------|----------------------|----------------------|
|                                                    | FULL NAME                                                  | GENE  | FITNESS EFFECT SCORE | FITNESS EFFECT SCORE | FITNESS EFFECT SCORE |
| <b>Arginine biosynthesis</b>                       |                                                            |       |                      |                      |                      |
|                                                    | Glutamine synthetase                                       | GLUL  | -0.125358532         | -0.054074159         | -0.019578279         |
|                                                    | Glutaminase 2                                              | GLS2  | -0.048640596         | -0.10856474          | -0.052528908         |
|                                                    | Glutamic-oxaloacetic transaminase 1                        | GOT1  | 0.028242354          | -0.063893637         | -0.073798616         |
|                                                    | Glutamic--Pyruvic Transaminase                             | GPT   | 0.037215894          | 0.10892219           | -0.216893048         |
|                                                    | Ornithine transcarbamylase                                 | OTC   | 0.147486186          | 0.100967984          | 0.138874274          |
|                                                    | Arginase 1                                                 | ARG1  | 0.227985584          | 0.091116773          | 0.024848929          |
|                                                    | Nitric Oxide Synthase 1                                    | NOS1  | -0.023334093         | -0.137541143         | -0.002959303         |
|                                                    | Argininosuccinate Synthase 1                               | ASS1  | -0.184888377         | -0.402563868         | -0.562629354         |
|                                                    | Argininosuccinate Lyase                                    | ASL   | -0.113055241         | -0.123584385         | -0.047769185         |
| <b>Alanine, aspartate and glutamate metabolism</b> |                                                            |       |                      |                      |                      |
|                                                    | Succinate-semialdehyde dehydrogenase                       | SSDH  | -0.149665574         | -0.092021306         | -0.23551055          |
|                                                    | Aminobutyrate aminotransferase                             | ABAT  | -0.047346955         | -0.075226835         | 0.005737048          |
|                                                    | Glutamate Decarboxylase 1                                  | GAD1  | -0.044126537         | 0.003160126          | -0.09859572          |
|                                                    | Glutamate dehydrogenase 1                                  | GLUD1 | -0.021542034         | -0.072836976         | 0.080316519          |
|                                                    | Asparagine Synthetase                                      | ASNS  | -0.374287356         | -0.55876465          | -0.403428363         |
|                                                    | Glycine Amidinotransferase                                 | GATM  | -0.046046866         | -0.119724747         | -0.183393939         |
| <b>Arginine and proline metabolism</b>             |                                                            |       |                      |                      |                      |
|                                                    | Ornithine Decarboxylase 1                                  | ODC1  | -0.05327327          | 0.048019018          | 0.109983109          |
|                                                    | Spermidine/Spermine N1-Acetyltransferase                   | SAT2  | -0.19112135          | 0.004246237          | -0.175388686         |
| <b>Taurine and hypotaurine</b>                     |                                                            |       |                      |                      |                      |
|                                                    | Glutamate Decarboxylase 1                                  | GAD1  | -0.044126537         | 0.003160126          | -0.09859572          |
|                                                    | Glutamate Decarboxylase Like 1                             | GADL1 | 0.080229488          | -0.115932344         | 0.053750068          |
|                                                    | Gamma-Glutamyltransferase 6                                | GGT6  | -0.048655115         | -0.089863757         | -0.007089641         |
| <b>Glycine, serine and threonine metabolism</b>    |                                                            |       |                      |                      |                      |
|                                                    | Serine Dehydratase                                         | SDS   | 0.2145656            | 0.012084165          | 0.021749979          |
|                                                    | Serine hydroxymethyltransferase                            | SHMT  | 0.089762197          | -0.106194689         | -0.173416165         |
|                                                    | Alanine-Glyoxylate Aminotransferase                        | AGXT  | -0.000518467         | 0.056342348          | -0.085768781         |
|                                                    | Guanidinoacetate methyltransferase                         | GAMT  | -0.067677445         | 0.015662028          | 0.04233071           |
|                                                    | Antiquitin 1                                               | ATQ1  | -0.154061124         | -0.078707501         | 0.024371521          |
|                                                    | L-Arginine:glycine amidinotransferase                      | AGAT  | -0.046046866         | -0.119724747         | -0.183393939         |
| <b>Vitamin B6 metabolism</b>                       |                                                            |       |                      |                      |                      |
|                                                    | Pyridoxine 5-prime-phosphate oxidase                       | PNPO  | 0.002519954          | -0.063587768         | 0.041033014          |
| <b>Cysteine and methionine metabolism</b>          |                                                            |       |                      |                      |                      |
|                                                    | Betaine-homocysteine methyltransferase                     | BHMT  | -0.101017733         | -0.080660636         | 0.044393697          |
|                                                    | Glutathione Synthetase                                     | GSS   | -0.095373599         | -0.009352038         | 0.168192909          |
|                                                    | ChaC Glutathione Specific Gamma-Glutamylcyclotransferase 1 | CHAC  | 0.103413191          | -0.118655017         | -0.185636384         |
